# Supplementary material
Source: publisher figshare collection journal article supplement (https://gsapubs.figshare.com/ndownloader/files/27185081)
Supplement: Supplementary file 1 [file 27185081]

Table S1. Locations of radiocarbon samples from Badger Canyon.

| Sample number | Context | Latitude (degrees) | Longitude (degrees) | Depth (m) |
| --- | --- | --- | --- | --- |
| BC-15 | Qa4 in WT-1A | 34.1924 | -117.3128 | 2.9 |
| BC-51 split 1 | Qa4, natural exposure in Badger Canyon | 34.1917 | -117.3123 | 1.5 |
| BC-24 | Base of colluvium over Qf3a in WT-2 | 34.1917 | -117.3152 | 1.8 |
| BC-22 | Qf3b gravel in WT-1B | 34.1903 | -117.3150 | 2.0 |
| BC-42 | Qf3b in WT-1A, just south of fault | 34.1914 | -117.3142 | 3.7 |
| BC-17 | Qf2b in WT-1A, north of fault, above Qls2 | 34.1929 | -117.3122 | 2.3 |
| BC-11 | Qc2 in WT-1A, north of fault, below Qls2 | 34.1923 | -117.3130 | 2.4 |
| BC-20 | ET-2B, east of Badger Canyon | 34.1852 | -117.3042 | 3.0 |
| BC-8 | Near apex of Qf2 in WT-3C | 34.1926 | -117.3168 | 2.8 |
| BC-13 | Qf2a in WT-1A, north of fault, below Qc2 | 34.1915 | -117.3140 | 2.0 |
| BC-46 | Qf2a in WT-1A, north of fault, below Qc2 | 34.1916 | -117.3140 | 2.6 |
